# Supplementary material for: HSP90AA1-mediated autophagy promotes drug resistance in osteosarcoma
Source: PubMed Central journal article supplement (PMC6114771; doi:10.1186/s13046-018-0880-6), 2018-08-28

**A**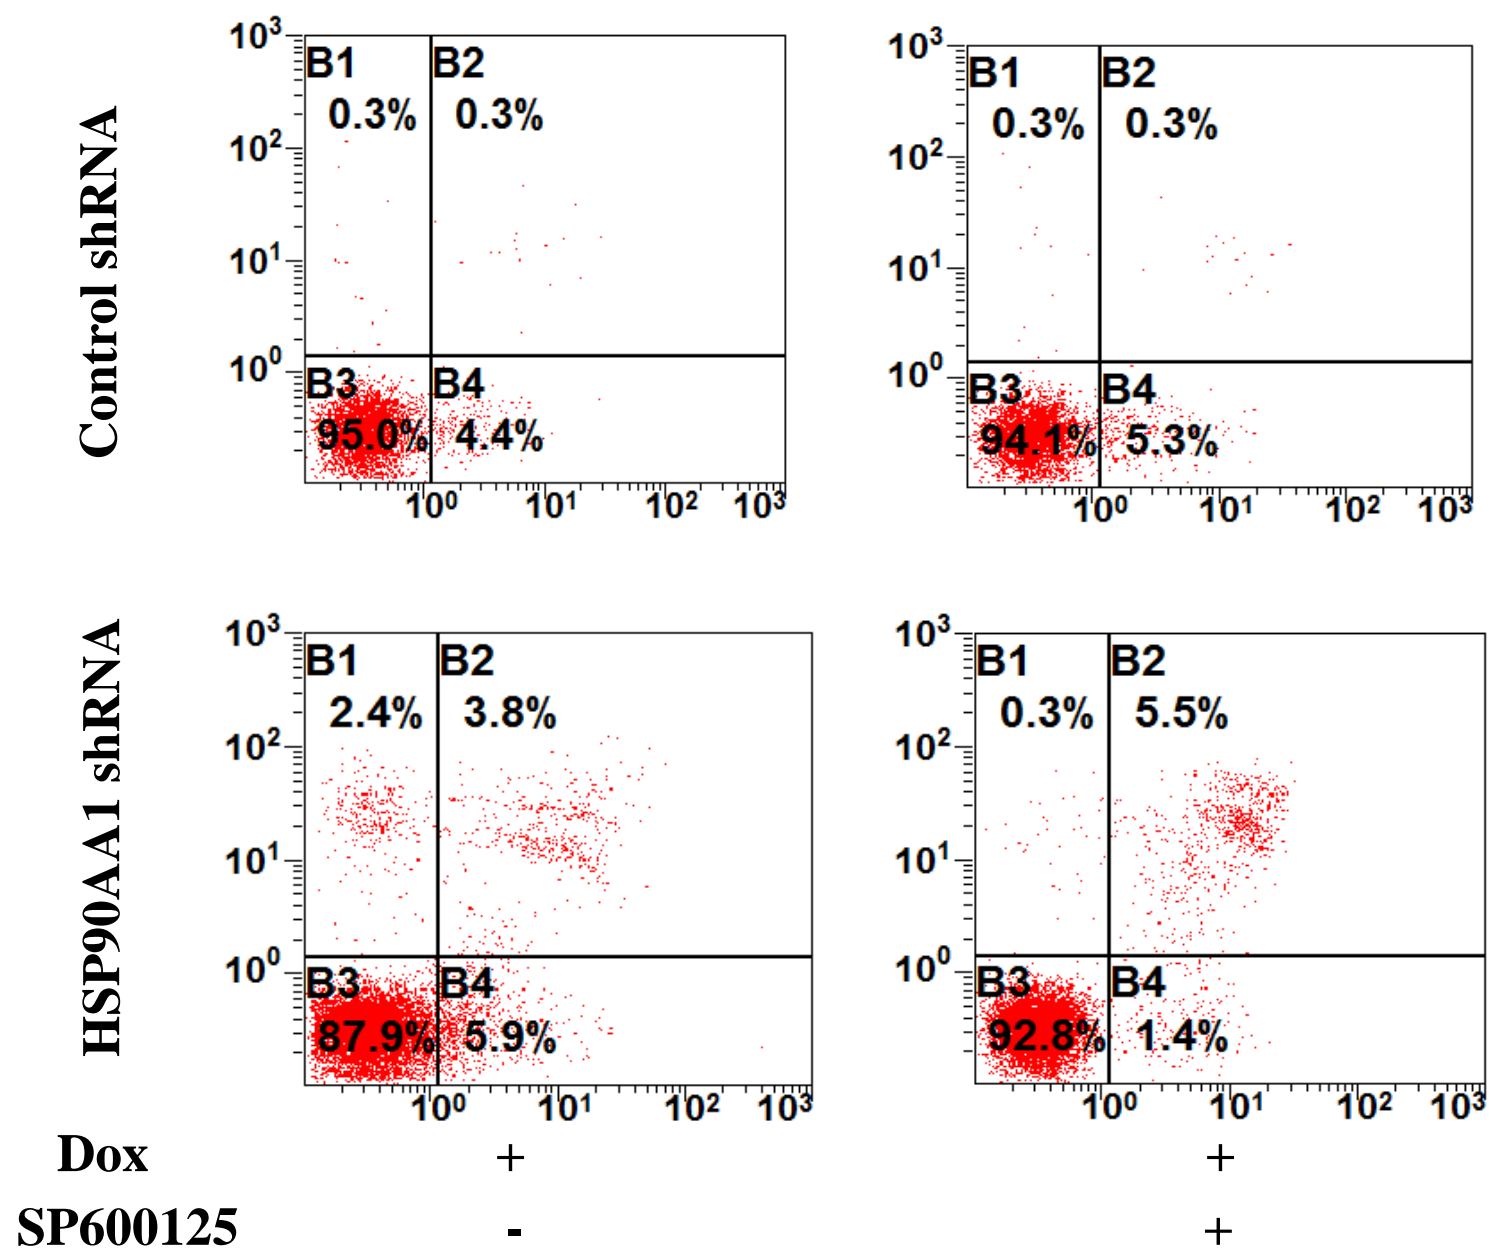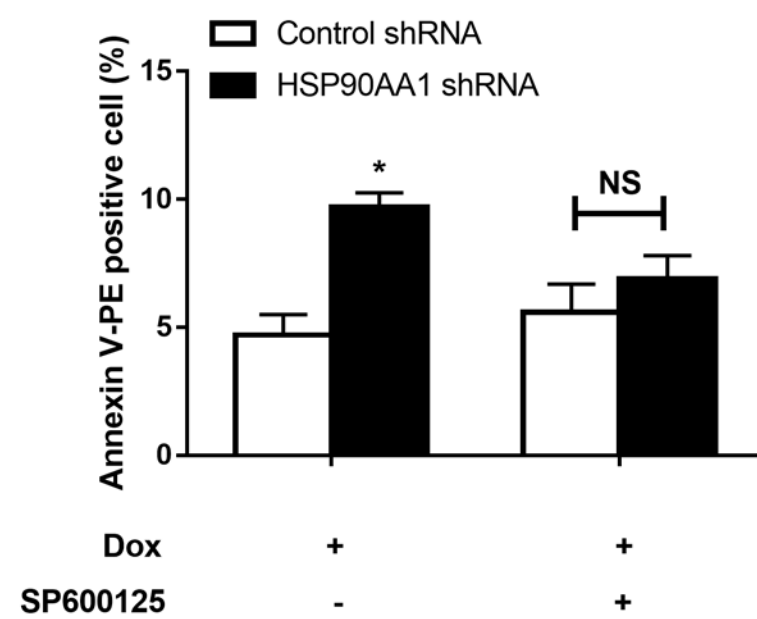**B**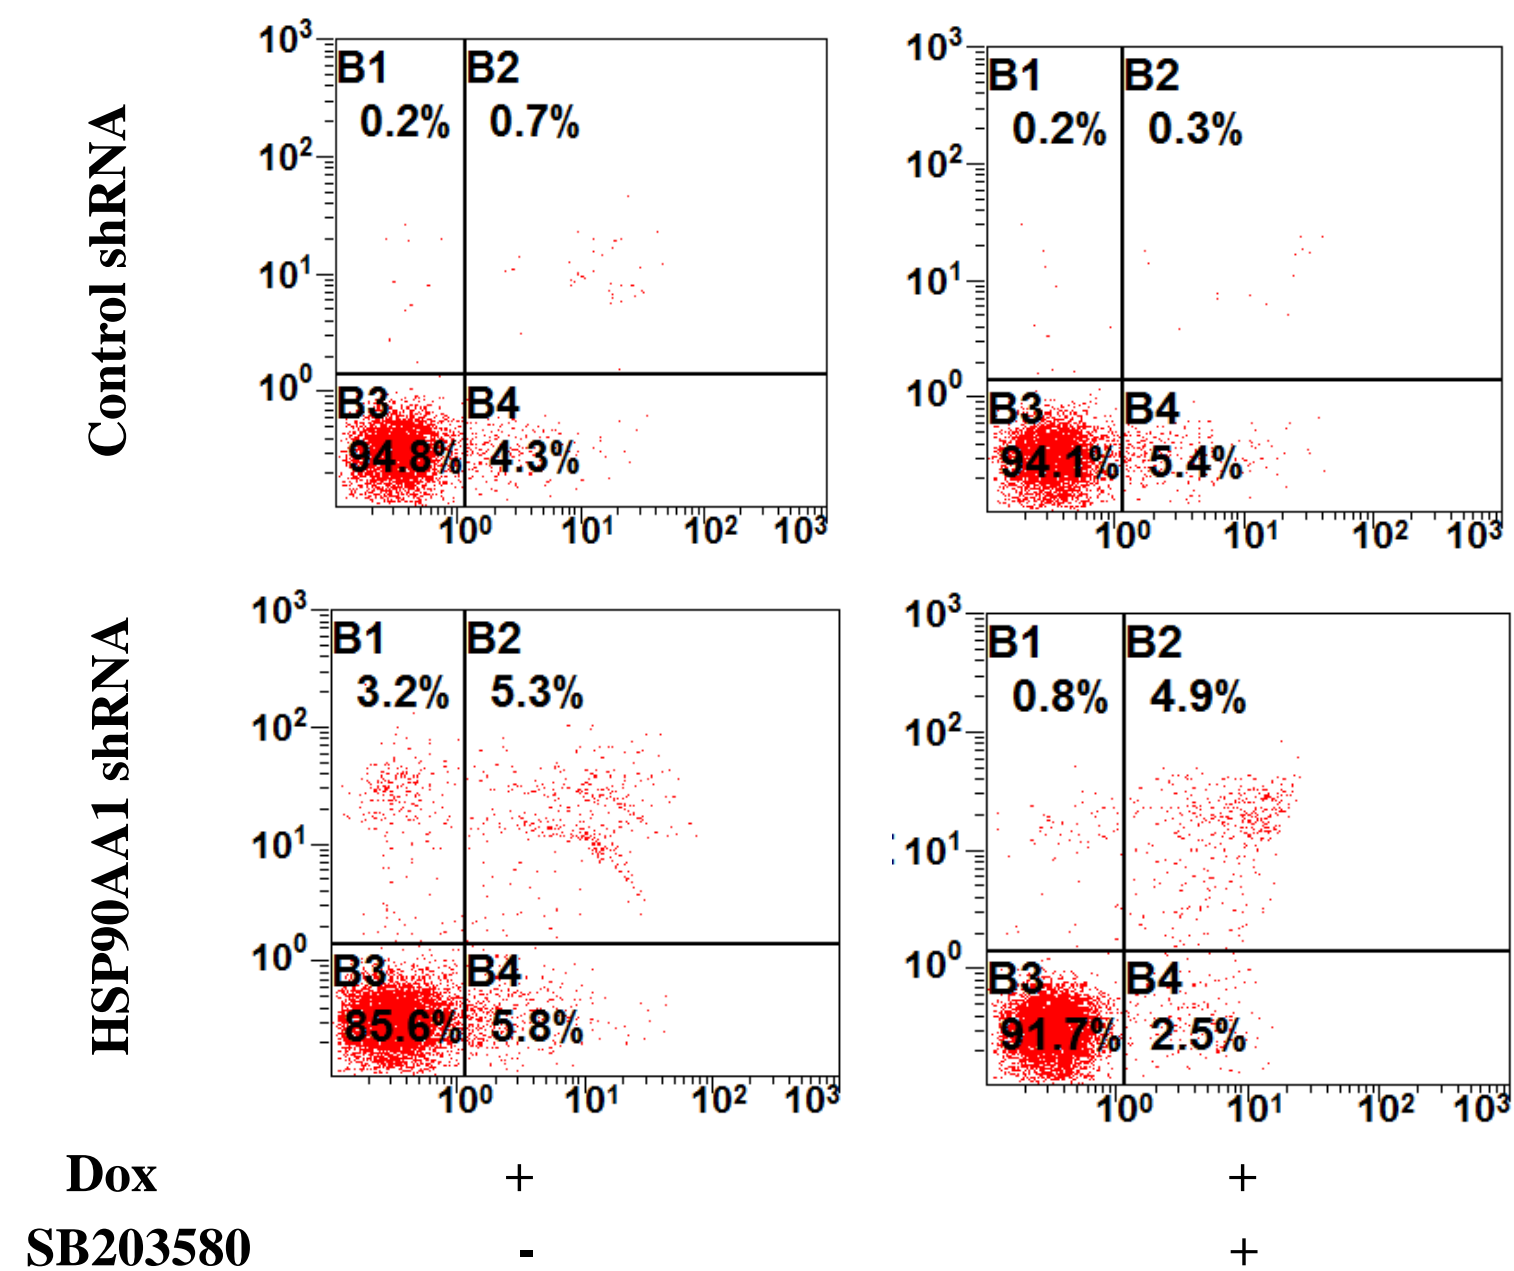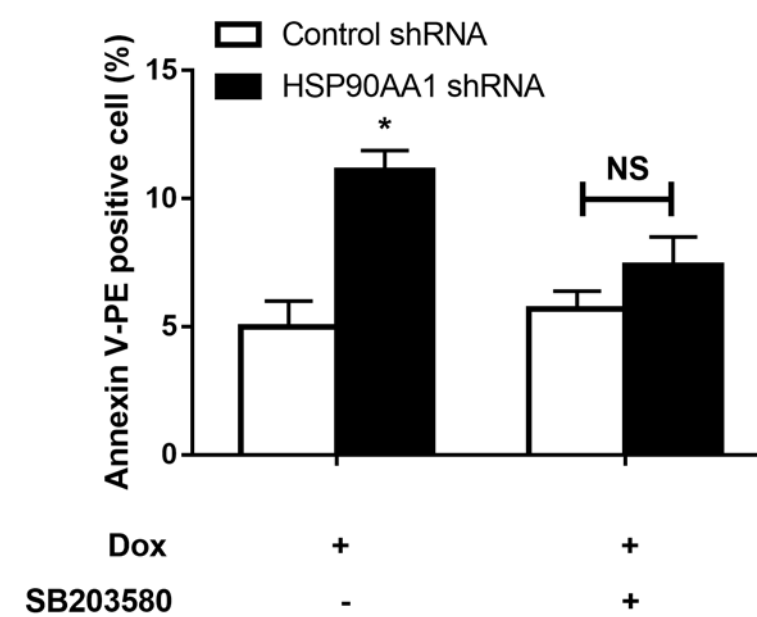

Supplement: 13046_2018_880_MOESM2_ESM.pdf [file 13046_2018_880_MOESM2_ESM.pdf]
